# Supplementary material for: Mitochondrial respiration is sensitive to cytoarchitectural breakdown
Source: Royal Society of Chemistry journal article supplement (doi:10.1039/c6ib00192k), 2016-10-05
Supplement: c6ib00192k1.pdf [file c6ib00192k1.pdf]

1 **Supplementary Information for “Mitochondrial respiration is sensitive to cytoarchitectural**  
2 **breakdown” by Judith Kandel, Alessia A. Angelin, Douglas C. Wallace, and David M. Eckmann**

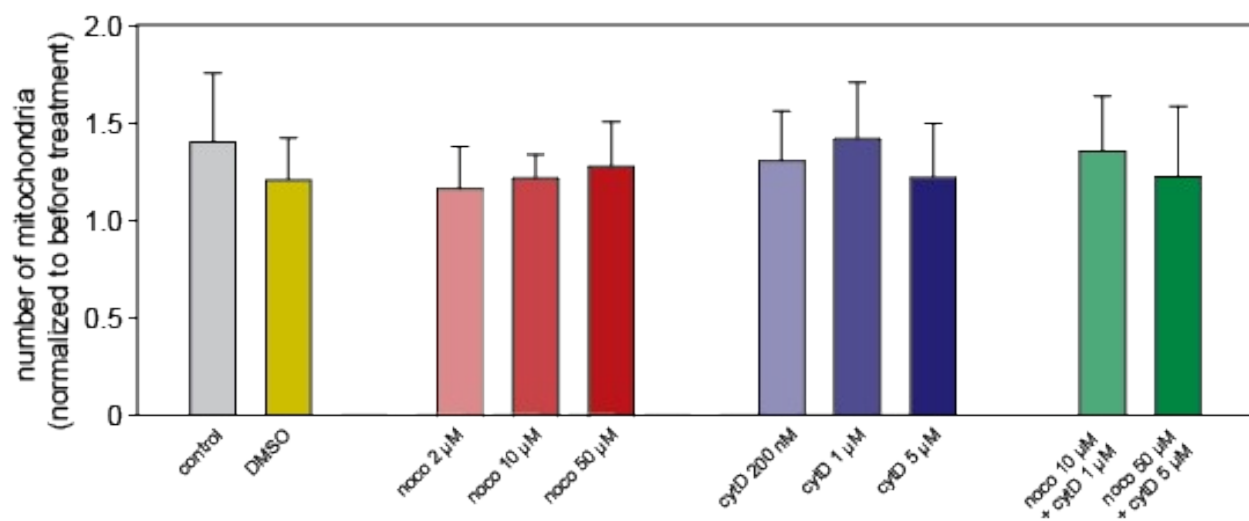

3

4 **Fig S1. Number of mitochondria does not change following treatment with cytoskeletal toxins.**

5 Pairwise t-tests yielded no significant differences in number of mitochondria following treatment in any  
6 experimental group as compared to the control group.

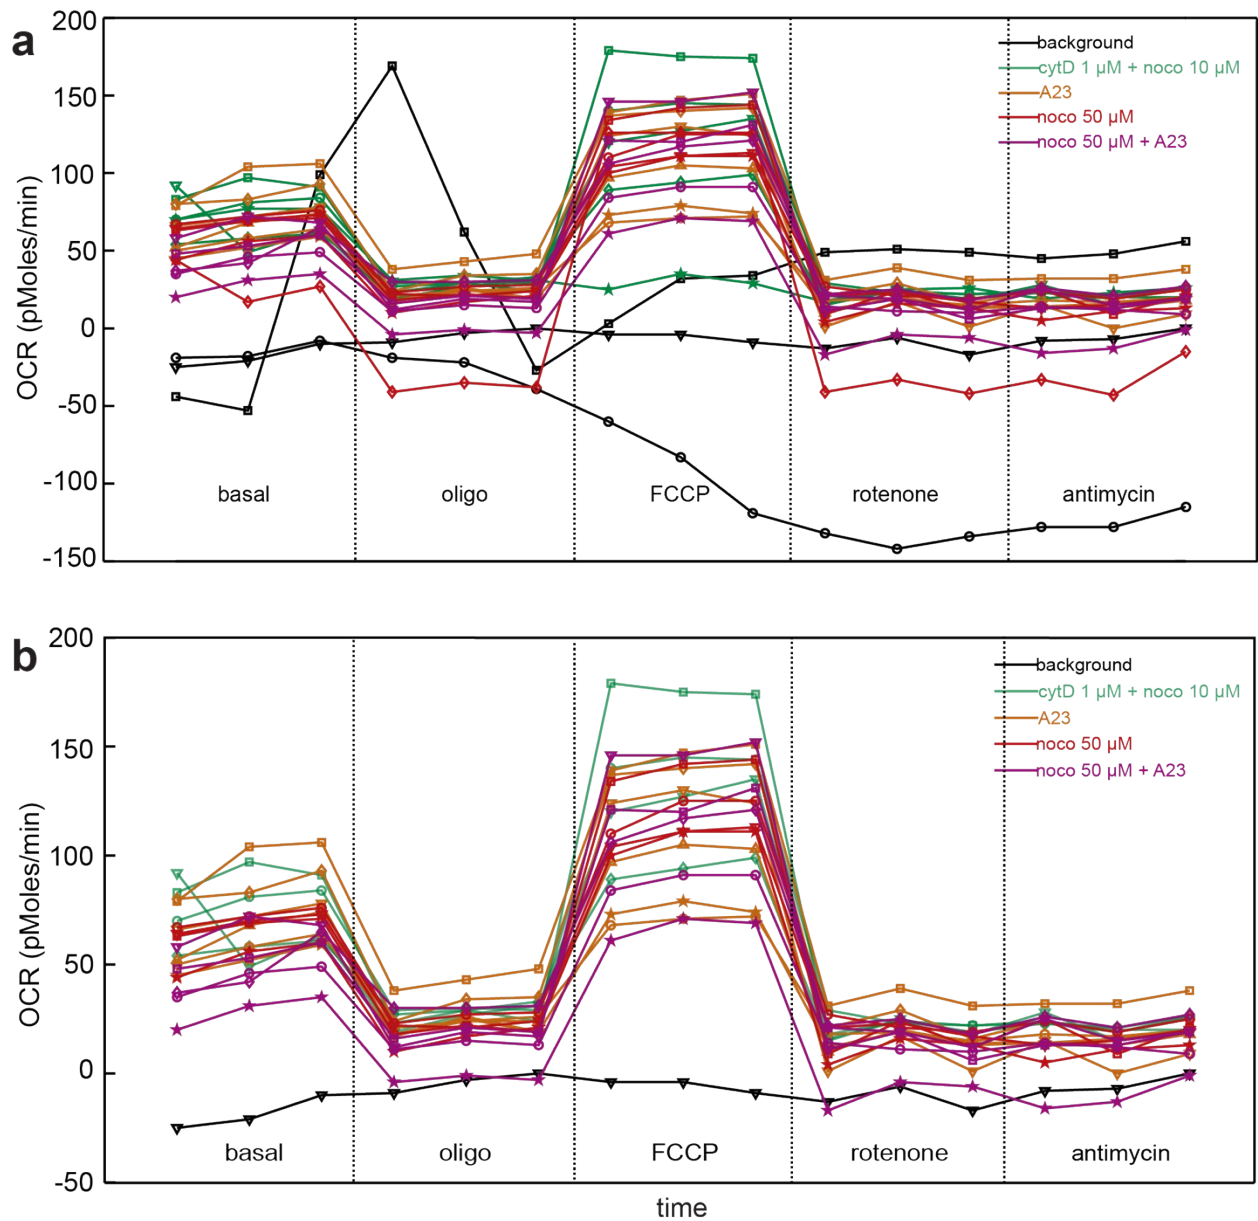

7

8 **Fig S2. Raw data from experiment shown in Fig 4a.** (a) Sample oxygen consumption experiment. Each  
 9 tracing represents a single well. Wells of the same group are colored identically but differ in their  
 10 representing symbol. Outliers are included. (b) The same experiment as in (a), but with outliers omitted  
 11 prior to analysis.
